# Supplementary material for: Performance of a Multigene Genomic Classifier in Thyroid Nodules With Indeterminate Cytology: A Prospective Blinded Multicenter Study
Source: PubMed Central journal article supplement (PMC6439562; doi:10.1001/jamaoncol.2018.4616), 2018-11-08
Supplement: jamaoncol-e184616-s001.pdf [file jamaoncol-e184616-s001.pdf]

## Supplementary Online Content

Steward DL, Carty SE, Sippel RS, et al. Performance of a multigene genomic classifier in thyroid nodules with indeterminate cytology: a prospective blinded multicenter study [published online November 8, 2018]. *JAMA Oncol*. doi:10.1001/jamaoncol.2018.4616

**eMethods 1. Central pathology review**

**eMethods 2. Supplemental statistical analysis**

**eTable 1. Agreement between local pathology diagnosis and central pathology review diagnosis**

**eTable 2. Distribution of samples and histopathology diagnoses contributed from 10 study sites**

**eTable 3. Characteristics of patients and nodules in the study cohort**

**eTable 4. Genomic classifier (GC) scores and alteration types detected in samples with negative and positive test results**

**eTable 5. Demographic, clinical and pathological characteristics of cases with false negative test result**

**eTable 6. Characteristics of 34 cases with false-positive test results**

**eTable 7. Study characteristics and performance of ThyroSeq GC and Afirma GEC and GSC in Bethesda III and IV indeterminate cytology thyroid nodules**

**eFigure 1. Distribution of GC scores in nodules with different histopathology**

This supplementary material has been provided by the authors to give readers additional information about their work.

## Supplementary Online Content

Steward DL; Carty SE, Sippel RS, et al. Performance of ThyroSeq Genomic Classifier in Thyroid Nodules with Indeterminate Cytology: A Prospective Blinded Multicenter Study

**eMethods 1.** Central pathology review

**eMethods 2.** Supplemental statistical analysis

**eTable 1.** Agreement between local pathology diagnosis and central pathology review diagnosis

**eTable 2.** Distribution of samples and histopathology diagnoses contributed from 10 study sites

**eTable 3.** Characteristics of patients and nodules in the study cohort

**eTable 4.** Genomic classifier (GC) scores and alteration types detected in samples with negative and positive test results

**eTable 5.** Demographic, clinical and pathological characteristics of cases with false negative test result

**eTable 6.** Characteristics of 34 cases with false-positive test results

**eTable 7.** Study characteristics and performance of ThyroSeq GC and Afirma GEC and GSC in Bethesda III and IV indeterminate cytology thyroid nodules

**eFigure 1.** Distribution of GC scores in nodules with different histopathology

### **eMethods 1. Central Pathology Review**

Central pathology review was performed by a panel of three expert thyroid pathologists (Z.W.B., R.V.L., R.R.S.) using digitalized images from representative histological slides of each nodule. The reviewers were blinded to the results of local pathology and each other's diagnosis. Cases with discrepant diagnoses issued by the panel pathologists were re-reviewed at a teleconference, and a consensus diagnosis was reached in all cases. For nodules for which digitalized images were not available for review (n=12, 4%), local pathology diagnosis was accepted as final diagnosis.

## eMethods 2. Supplemental statistical analysis

### Sample size justification

We planned to enroll 400 subjects for this study. Our objective was to demonstrate an increase in NPV from the current aggregate estimate of 89% to a targeted NPV of 95% with a maximum 95% confidence interval width of +/- 5% for the ThyroSeq genomic classifier. We assumed the classifier would be capable of 84% sensitivity, an improvement over the 63% of the older 7 gene panel classifier. Assuming a prevalence of malignant disease (24%) and the specificity of 91%, 84% sensitivity will provide the desired 95% NPV. A minimum of 200 patients with indeterminate cytology and surgical pathology outcome will be required to guarantee the desired 95% confidence interval on NPV with a lower boundary of 90%. Allowing for lower than anticipated disease prevalence we elected to enroll 400 patients from the original participating 8 sites (~50 from each site).

### The programming code used to generate results

```
#----- Table 1 -----

#----- Performance of +/- 1.5 cutoff, separately for Bethesda Category and diag2/diag3
table(Score > 1.5, diag2)
# fix collating order for function class.oc()
A2$Sc <- ifelse(Score > 1.5, " pos", "neg")
# create ordered factors Diag2 and Diag3, for use of my function class.oc()
A2$Diag2 <- ordered(diag2, levels = c("Malignant", "Benign"))

attach(A2) # version with cutoff Sc

# All
table(Sc, Diag2)
class.oc(table(Sc, Diag2))
# Bethesda category 3
table(Sc[Bethesda.Category == 3], Diag2[Bethesda.Category == 3])
class.oc(table(Sc[Bethesda.Category == 3], Diag2[Bethesda.Category == 3]))
# Bethesda category 4
table(Sc[Bethesda.Category == 4], Diag2[Bethesda.Category == 4])
class.oc(table(Sc[Bethesda.Category == 4], Diag2[Bethesda.Category == 4]))
# Bethesda categories 3 & 4
table(Sc[Bethesda.Category %in% c(3,4)], Diag2[Bethesda.Category %in% c(3,4)])
class.oc(table(Sc[Bethesda.Category %in% c(3,4)], Diag2[Bethesda.Category %in% c(3,4)]))

#----- Figure 2 -----
plot.PV <- function(p, tpf, fpf, n, m, reline = NULL, xlab = "Disease Prevalence (%)", x.leg = 43, y.leg = 40,
legend = T,...) {
  # p = prevalence, n = # negative tests, m = # positive tests
  NPV <- ((1-p) * (1-fpf)) / (((1-p) * (1-fpf)) + (p * (1-tpf)))
  P2PV <- (p * tpf) / ((p * tpf) + ((1-p) * fpf))
  ci.neg <- binconf(NPV * n,n)
  ci.pos <- binconf(PPV * m,m)
  Z.neg <- data.frame(p, NPV, ci.neg)
  Z.pos <- data.frame(p, PPV, ci.pos)
```

```

# for plotting change p and PV's to a percent
plot(Z.neg$p * 100, Z.neg$NPV * 100, type = "l", pty = "n", xaxt = "n", yaxt = "n", xlab = xlab,...)
axis(1, at = seq(0,100,10))
axis(2, at = seq(0,100,10), las = 1)
lines(Z.neg$p * 100, Z.neg$NPV * 100, lty = 1, col = "blue", lwd = 3)
lines(Z.neg$p * 100, Z.neg$Lower * 100, lty = 2, col = "blue", lwd = 2)
lines(Z.neg$p * 100, Z.neg$Uppe * 100, lty = 2, col = "blue", lwd = 2)

lines(Z.pos$p * 100, Z.pos$PPV * 100, lty = 1, col = "red3", lwd = 3)
lines(Z.pos$p * 100, Z.pos$Lower * 100, lty = 2, col = "red3", lwd = 2)
lines(Z.pos$p * 100, Z.pos$Upper * 100, lty = 2, col = "red3", lwd = 2)
abline(h = refline)
#grid()
abline(h = seq(0,100, by = 10), v = seq(0,100, by = 10), lty = "dotted", col = "lightgray")
if(legend) legend(x.leg, y.leg, c("NPV", "PPV"), lty = 1, lwd = 2, col = c("blue", "red3" ))
invisible(data.frame(Z.neg, Z.pos))
}

# plot only BC3
# Bethesda category 3
table(Sc[Bethesda.Category == 3], Diag2[Bethesda.Category == 3])
class.oc(table(Sc[Bethesda.Category == 3], Diag2[Bethesda.Category == 3]))
#num pos tests = 50; num neg tests = 104, sen = .914, spec = .849
par(pin = c(5,3), cex.axis = 1.15, cex.lab = 1.25)
aa <- plot.PV(p = seq(0, 1, length = 100), tpf = .914, fpf = 1 - .849, n = 104, m = 50, refline = NA,
  ylab = "NPV, PPV of ThyroSeq GC", main = "Bethesda Category III", legend = F)

# plot only BC4
# Bethesda category 4
table(Sc[Bethesda.Category == 4], Diag2[Bethesda.Category == 4])
class.oc(table(Sc[Bethesda.Category == 4], Diag2[Bethesda.Category == 4]))
#num pos tests = 47; num neg tests = 46, sen = .970, spec = .750
aa <- plot.PV(p = seq(0, 1, length = 100), tpf = .970, fpf = 1 - .750, n = 46, m = 47, refline = NA,
  ylab = "NPV, PPV of ThyroSeq GC", main = "Bethesda Category IV", legend = F)

# plot only Bc3 + BC4
# Bethesda categories 3 & 4
table(Sc[Bethesda.Category %in% c(3,4)], Diag2[Bethesda.Category %in% c(3,4)])
class.oc(table(Sc[Bethesda.Category %in% c(3,4)], Diag2[Bethesda.Category %in% c(3,4)]))
#num pos tests = 97; num neg tests = 150, sen = .941, spec = .816 (slightly different from above?)
aa <- plot.PV(p = seq(0, 1, length = 100), tpf = .941, fpf = 1 - .816, n = 150, m = 97, refline = NA,
  ylab = "NPV, PPV of ThyroSeq v3 Test", main = "Bethesda Categories III & IV", legend = F)

#----- eTable 1 -----
#----- sample equivalency -----
# The final validation set is a subset of a larger sample. Is the final selection difference from those not selected?
# compare age,gender and (mean)nodule size and number of nodules between
# all with indeterminate cytology (318) but excluded (86) and the 232 finalists

table(D$Exclusion)
# remove those excluded for not having indeterminate cytology (code 0)
ex <- subset(D, Exclusion %in% c(1,2,3,4,6,7))
inc <- subset(D, Exclusion == 5)
B <- data.frame(rbind(ex, inc))
B$group <- c(rep("ex", nrow(ex)), rep("inc", nrow(inc)))

```

```
table(B$group)
```

```
test2(B$Age, B$group, T)
tab.test(B$Gender, B$group)
test2(B$mean.size, B$group, T)
test2(B$num.nodules, B$group, T)
```

```
#----- eFigure 1 -----
```

```
cd <- MC$Consensus.Dx
cd2 <- cd
cd2[cd == "PTC, EFV"] <- "PTC"
cd2[cd == "PTC, FV"] <- "PTC"
cd2[cd == "OFTC"] <- "HCC"
cd2[cd == "MRCC"] <- "mRCC"
cd2[cd == "OHN"] <- "HN,HC"
cd2[cd == "OFA"] <- "HCA"
table(MC$Consensus.Dx, cd2)
cd3 <- ordered(cd2, levels = c("HN", "HN,HC", "FA", "HCA", "NIFTP", "PTC", "FTC", "HCC", "MTC",
"mRCC"))
table(MC$Consensus.Dx, cd3)

# calculate "percent of each score"
# create a special data frame for this
t10 <- table(cd3, Score)
tot <- apply(t10, 1, sum)
t11 <- apply(t10, 2, function(x) x / tot * 100)
t12 <- data.frame(row.names(t11), t11)
names(t12)[1] <- "cd3"

MC4 <- reshape(t12, direction = "long", varying = 2:8, idvar = "cd3", v.names = "pct", timevar = "Score", times =
0:6)
MC4$cd4 <- ordered(MC4$cd3, levels = c("HN", "HN,HC", "FA", "HCA", "NIFTP", "PTC", "FTC", "HCC",
"MTC", "mRCC"))

# using a custom palette
# get two shades of green for scores (0,1); get five shades of red for scores 2 - 6
greens <- rgb(c(.9, .7), red = 0, blue = 0)
#reds <- rgb(c(1, .85, .7, .55, .4), green = 0, blue = 0)
reds <- rgb(c(1,.9, .8, .7,.6), green = 0, blue = 0)
custom.colors <- c(greens, reds)
showpanel(custom.colors)

# finally there is a request to remove the last 2 categories that each have only 1 specimen
MC4.temp <- subset(MC4, cd4 != "MTC" & cd4 != "mRCC")

ggplot(MC4.temp, aes(x = cd4, y = pct, fill = as.factor(Score))) + geom_bar(stat = "identity")+ labs(fill = "Score") +
  xlab("Pathology Diagnosis") + ylab("Percentage") +
  scale_fill_manual(values = custom.colors)+ guides(fill = guide_legend(reverse = T)) +
  theme(axis.text.x = element_text(size = rel(1.25))) + theme(axis.text.y = element_text(size = rel(1.25))) +
  theme(axis.title.x = element_text(size = rel(1.25))) + theme(axis.title.y = element_text(size = rel(1.25))) +
  theme(legend.text = element_text(size = rel(1.25))) + theme(legend.title = element_text(size = rel(1.25)))
```

```
#-----
```

**eTable 1.** Agreement between local pathology diagnosis and central pathology review diagnosis

| <b>Agreement/disagreement</b>      | <b>Number of cases</b> | <b>%</b> |
|------------------------------------|------------------------|----------|
| Complete agreement                 | 209                    | 76.3     |
| Minor disagreement <sup>a</sup>    | 45                     | 16.4     |
| Moderate disagreement <sup>b</sup> | 11                     | 4.0      |
| Major disagreement <sup>c</sup>    | 9                      | 3.3      |
| Total available for central review | 274                    | 100      |

<sup>a</sup> Minor disagreement: disagreement between subtypes of benign or malignant nodules

<sup>b</sup> Moderate disagreement: benign vs NIFTP or NIFTP vs malignant

<sup>c</sup> Major disagreement: benign vs malignant

**eTable 2.** Distribution of samples and histopathology diagnoses contributed from 10 study sites

| Site number | Total samples | Histopathology diagnosis* |           |       | Cancer+NIFTP prevalence |
|-------------|---------------|---------------------------|-----------|-------|-------------------------|
|             |               | Benign*                   | Malignant | NIFTP |                         |
| 1           | 91            | 73                        | 16        | 2     | 20%                     |
| 2           | 88            | 66                        | 18        | 4     | 25%                     |
| 3           | 21            | 12                        | 8         | 1     | 43%                     |
| 4           | 20            | 8                         | 11        | 1     | 60%                     |
| 5           | 19            | 15                        | 3         | 1     | 21%                     |
| 6           | 13            | 7                         | 6         | 0     | 46%                     |
| 7           | 11            | 6                         | 4         | 1     | 45%                     |
| 8           | 11            | 10                        | 1         | 0     | 9%                      |
| 9           | 6             | 4                         | 1         | 1     | 33%                     |
| 10          | 6             | 5                         | 1         | 0     | 17%                     |
| Total       | 286           | 206                       | 69        | 11    | 28%                     |

\*Based on central pathology review



**eTable 3.** Characteristics of patients and nodules with indeterminate cytology in the excluded and evaluated cohorts

| <b>Characteristic</b>                       | <b>All Cases with Indeterminate Cytology</b> | <b>Indeterminate Cytology and Excluded</b> | <b>Final Evaluation Cohort</b> | <b>Test of Equality*</b> |
|---------------------------------------------|----------------------------------------------|--------------------------------------------|--------------------------------|--------------------------|
| <b>Total no</b>                             |                                              |                                            |                                |                          |
| Patients                                    | 318                                          | 86                                         | 232                            | N/A                      |
| Nodules                                     | 350                                          | 93                                         | 257                            |                          |
| <b>Gender</b>                               |                                              |                                            |                                |                          |
| Female                                      | 251 (79%)                                    | 65 (76%)                                   | 186 (80%)                      | .44                      |
| Male                                        | 67 (21%)                                     | 21 (24%)                                   | 46 (20%)                       |                          |
| <b>Age</b>                                  |                                              |                                            |                                |                          |
| Median                                      | 54                                           | 54.5                                       | 53                             | .01                      |
| IQR                                         | 43 – 62                                      | 43 - 66                                    | 42 – 61                        |                          |
| <b>Nodule Size by Ultrasound, mean (cm)</b> | 2.42                                         | 2.5                                        | 2.4                            | .12                      |
| <b>Number of Nodules per Patient, mean</b>  | 1.24                                         | 1.23                                       | 1.25                           | .72                      |

\* Fisher's Exact test for age, Wilcoxon test for others, all tests are two tailed.

**eTable 4.** Genomic classifier (GC) scores and alteration types detected in samples with negative and positive test results

| Test result         | GC score | Number of cases | SNV/indels | Gene fusions | CNA | GEA |
|---------------------|----------|-----------------|------------|--------------|-----|-----|
| Negative<br>(n=152) | 0        | 131             | 0          | 0            | 0   | 0   |
|                     | 1        | 21              | 14         | 0            | 6   | 1   |
| Positive<br>(n=105) | 2        | 57              | 26         | 2            | 23  | 7   |
|                     | 3        | 2               | 2          | 0            | 0   | 0   |
|                     | 4        | 30              | 23         | 7            | 5   | 25  |
|                     | 5        | 5               | 4          | 1            | 4   | 4   |
|                     | 6        | 11              | 9          | 2            | 11  | 9   |

SNV, single nucleotide variations; Indels, insertions or deletions; CNA, copy number alterations; GEA, gene expression alterations

**eTable 5.** Demographic, clinical and pathological characteristics of cases with false negative test result

| Patient | Age | Sex | Nodule Size by US (cm) | Cytology Diagnosis | Contributing Pathology Diagnosis | Final Pathology Diagnosis | Vascular invasion | Extra-thyroidal extension |
|---------|-----|-----|------------------------|--------------------|----------------------------------|---------------------------|-------------------|---------------------------|
| 1       | 52  | F   | 4.0                    | Bethesda III       | FTC                              | PTC                       | No                | No                        |
| 2       | 65  | M   | 3.0                    | Bethesda III       | FA                               | PTC, EFV                  | No                | No                        |
| 3       | 57  | F   | 3.2                    | Bethesda III       | FTC                              | FTC                       | No                | No                        |
| 4       | 29  | F   | 4.0                    | Bethesda IV        | PTC                              | PTC                       | No                | No                        |
| 5       | 56  | F   | 1.1                    | Bethesda V         | PTC                              | PTC                       | No                | No                        |

FTC, Follicular thyroid carcinoma; FA, follicular adenoma; PTC, papillary thyroid carcinoma; PTC, EFV, encapsulated follicular variant, US, ultrasound

**eTable 6.** Characteristics of 34 cases with false-positive test results

| <b>Cytology diagnosis</b>                                       | <b>n (%)</b>    |
|-----------------------------------------------------------------|-----------------|
| Bethesda III                                                    | 18 (53%)        |
| Bethesda IV                                                     | 15 (44%)        |
| Bethesda V                                                      | 1 (3%)          |
| <b>Pathology findings</b>                                       |                 |
| HCA                                                             | 13 (38%)        |
| FA                                                              | 10 (29%)        |
| HN                                                              | 11 (32%)        |
| <b>Molecular findings</b>                                       |                 |
| Point mutations                                                 | 21 (62%)        |
| <i>RAS</i>                                                      | 18*             |
| <i>BRAF K601E</i>                                               | 1               |
| <i>EIF1AX</i>                                                   | 1               |
| <i>DICER1</i>                                                   | 1               |
| Fusions                                                         | 2 (6%)          |
| <i>THADA/IGF2BP3</i>                                            | 1               |
| <i>PAX8/PPARG</i>                                               | 1               |
| Copy number alterations (CNA)                                   | 15 (44%)        |
| Gene expression alterations (GEA)                               | 14 (41%)        |
| <b>Total cases with one or more clonal genetic alteration**</b> | <b>32 (94%)</b> |

\*Including 10 *NRAS*, 5 *HRAS*, and 3 *KRAS*

\*\*Including point mutations, gene fusions, and copy number alterations; excluding gene expression alterations.

HCA, Hürthle cell adenoma; FA, follicular adenoma; HN, hyperplastic follicular cell nodules and hyperplastic Hürthle cell nodules

**eTable 7.** Study characteristics and performance of ThyroSeq GC and Afirma GEC and GSC in Bethesda III and IV indeterminate cytology thyroid nodules

|                                                                                   | <b>ThyroSeq GC<sup>1</sup></b>         | <b>Afirma GEC<sup>2</sup></b>          | <b>Afirma GSC<sup>3</sup></b>            |
|-----------------------------------------------------------------------------------|----------------------------------------|----------------------------------------|------------------------------------------|
| Study type                                                                        | Multicenter, prospective, double-blind | Multicenter, prospective, double-blind | Multicenter, retrospective, double-blind |
| Total number, samples                                                             | 247                                    | 210                                    | 191                                      |
| Total number, patients                                                            | 223                                    | 199                                    | 183                                      |
| Age, mean (range), years                                                          | 51.7 (18-90)                           | 51.2 (22-85)                           | 51.6 (18-90)                             |
| Female, %                                                                         | 80                                     | 77                                     | 78                                       |
| Nodule size by ultrasound, median (range), cm                                     | 2.1 (0.5-7)                            | 2.5 (1-9.1)                            | 2.6 (1.0-9.1)                            |
| Disease prevalence, %                                                             | 27.5                                   | 24.3                                   | 23.7                                     |
| Sensitivity, % (95%CI)                                                            | 94.1 (86-98)                           | 90.2 (79-97)                           | 91.1 (79-98)                             |
| Specificity, % (95%CI)                                                            | 81.6 (75-87)                           | 51.6 (44-60)                           | 68.3 (60-76)                             |
| NPV                                                                               | 97.3 (93-99)                           | 94.3 (88-97)                           | 96.1 (90-99)                             |
| PPV                                                                               | 65.9 (56-75)                           | 37.4 (33-42)                           | 47.1 (36-58)                             |
| Benign call rate                                                                  | 61%                                    | 41%                                    | 54%                                      |
| Avoidable surgeries for histologically benign nodules with indeterminate cytology | 82%                                    | 52%                                    | 68%                                      |

<sup>1</sup>Current study

<sup>2</sup>Alexander EK, Kennedy GC, Baloch ZW, et al. Preoperative diagnosis of benign thyroid nodules with indeterminate cytology. *The New England journal of medicine*. 2012;367(8):705-715.

<sup>3</sup>Patel KN, Angell TE, Babiarez J, et al. Performance of a Genomic Sequencing Classifier for the Preoperative Diagnosis of Cytologically Indeterminate Thyroid Nodules. *JAMA Surg*. 2018. Published online May 23, 2018. doi:10.1001/jamasurg.2018.1153

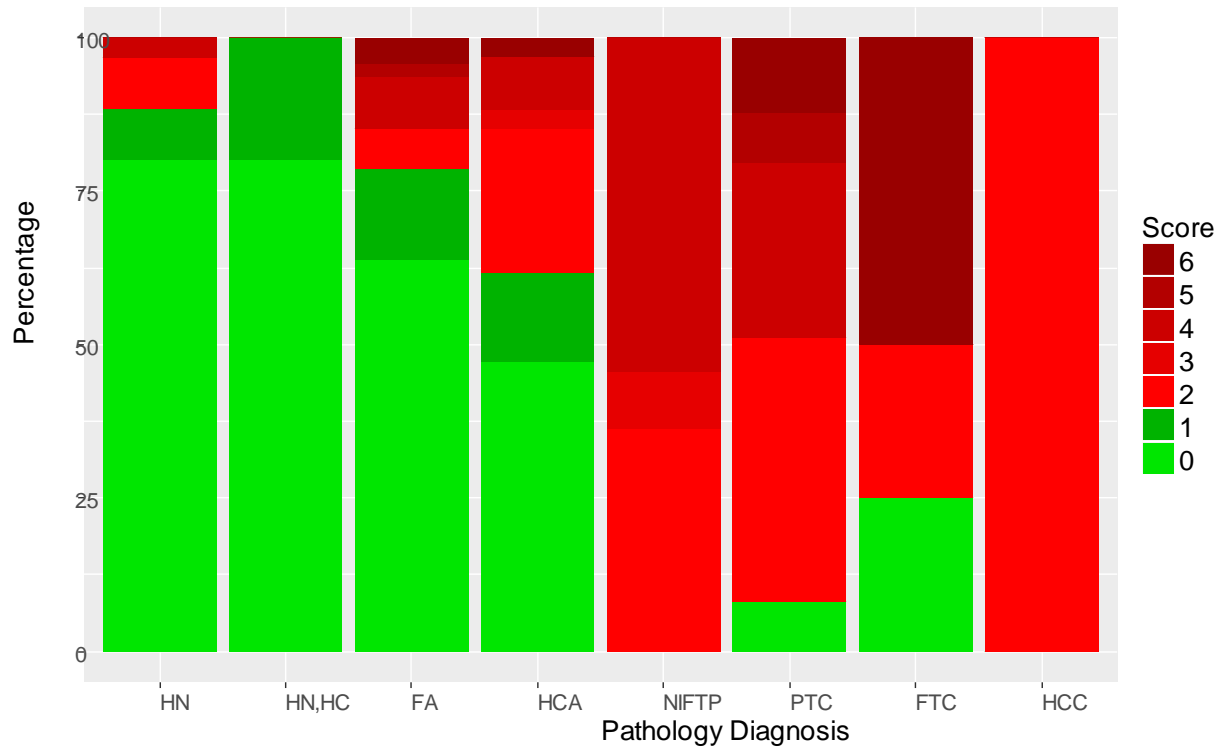

HN, hyperplastic follicular cell nodules; HN,HC, hyperplastic Hürthle cell nodules; FA, follicular adenoma; HCA, Hürthle cell adenoma; NIFTP, non-invasive follicular thyroid neoplasm with papillary-like nuclear features; PTC, papillary thyroid carcinoma; FTC, follicular thyroid carcinoma; HCC, Hürthle cell carcinoma; GC, genomic classifier.

**eFigure 1.** Distribution of GC scores in nodules with different histopathology.
